# Supplementary material for: Loss of microRNA-128 promotes cardiomyocyte proliferation and heart regeneration
Source: PubMed Central journal article supplement (PMC5816015; doi:10.1038/s41467-018-03019-z), 2018-02-16
Supplement: 41467_2018_3019_MOESM1_ESM.pdf [file 41467_2018_3019_MOESM1_ESM.pdf]

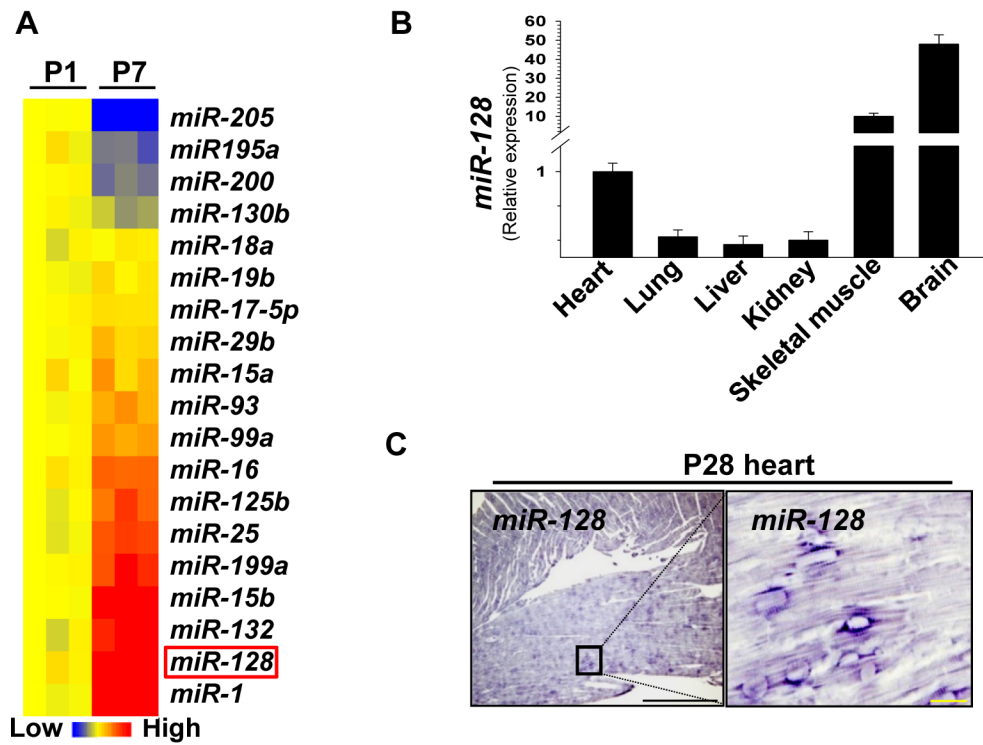

**Supplementary Figure 1. Expression of *miR-128* in postnatal hearts**

(A) Custom qPCR array of miRNA expression in wild type mouse hearts at postnatal day 1 (P1) and P7. (B) Analysis of *miR-128* expression by qPCR in multiple tissues of 8-week old adult mice (n=3). (C) Representative images of *miR-128* localization in adult mouse (P28) ventricular cross-sections analyzed by in situ hybridization using digoxigenin-labeled probe. Scale bars, 500  $\mu\text{m}$  (black); 25 $\mu\text{m}$  (yellow).

**A**

*miR-128<sup>TetRE</sup>*

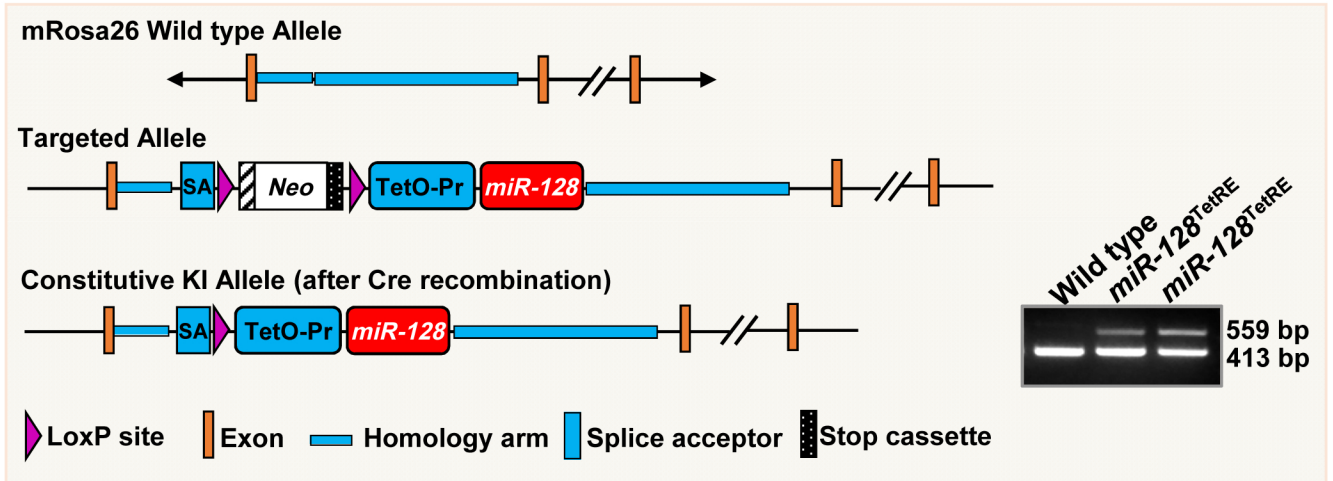

**B**

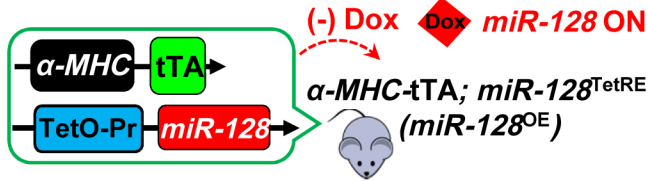

**D**

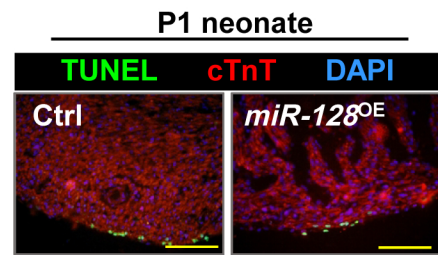

**C**

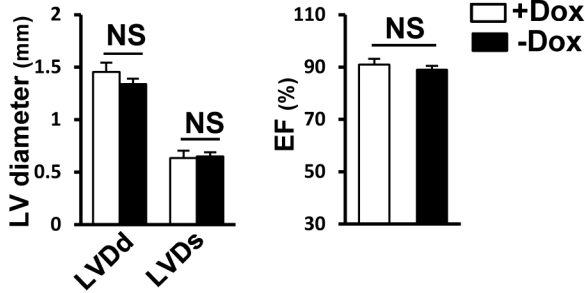

**E**

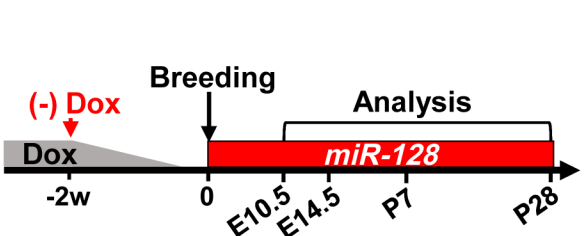

**F**

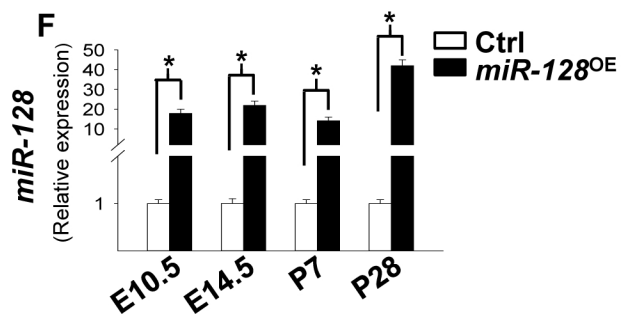

**G**

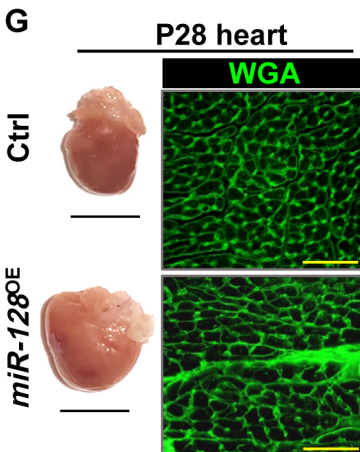

**H**

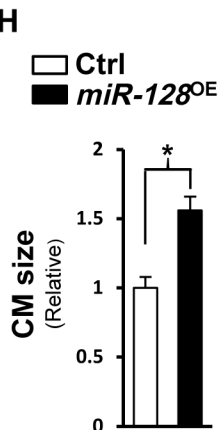

**I**

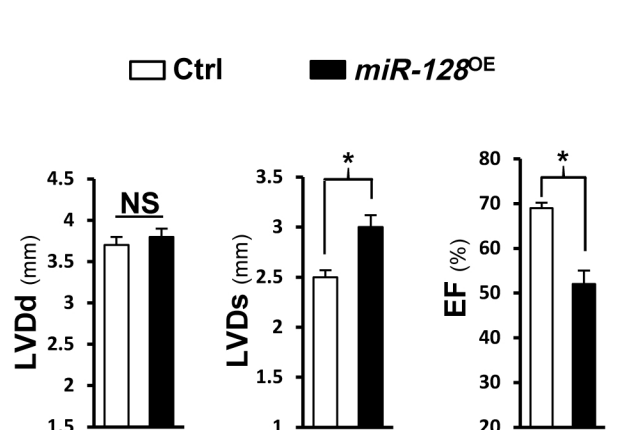

**Supplementary Figure 2. Generation of doxycycline-controlled *miR-128* overexpression transgenic mouse**

(A) The strategy for generating '*miR-128*<sup>TetRE</sup>' transgenic mouse. TetO-Pr, tetracycline operator promoter. (B) Generation of cardiomyocyte-specific *miR-128* overexpressing mice (*miR-128*<sup>OE</sup>) by breeding  $\alpha$ -MHC-tTA mice to *miR-128*<sup>TetRE</sup> mice. Control (Ctrl) mice were designated as *miR-128*<sup>TetRE</sup> mice, and *miR-128*<sup>OE</sup> mice were designated as  $\alpha$ -MHC-tTA; *miR-128*<sup>TetRE</sup> mice. (C) Heart function analyzed by echocardiography in P1 mice as measured by left ventricular end-diastolic diameter (LVDD), LV end-systolic diameter (LVDS), and ejection fraction (EF) (n=6). (D) Evaluation of apoptosis in cardiomyocytes (CMs) by TUNEL staining in Ctrl and *miR-128*<sup>OE</sup> heart sections at P1 (n=3). Scale bars, 100  $\mu$ m. (E) Experimental design to determine the effect of CM-specific overexpression of *miR-128* on heart development. (F) Analysis of *miR-128* expression by qPCR in the heart development, including embryonic day 10.5 (E10.5), E14.5, postnatal day 7 (P7), and P28 (n=3). (G) Representative images of gross heart morphology (left panel) and Wheat germ agglutinin (WGA) staining (right panel) of heart at P28 (n=5 mice, ~200 CMs/heart). Scale bars, 0.5 cm (black); 50  $\mu$ m (yellow). (H) Quantification data of CM size analyzed by WGA staining. (I) Heart function analyzed by echocardiography in P28 mice as measured by LVDD, LVDS, and EF (n=6). Statistical significance was calculated using Student's *t*-test in C, D, F, H and I. Data are represented as means  $\pm$  SEM. \**P* < 0.05. NS, not significant. Dox, Doxycycline.

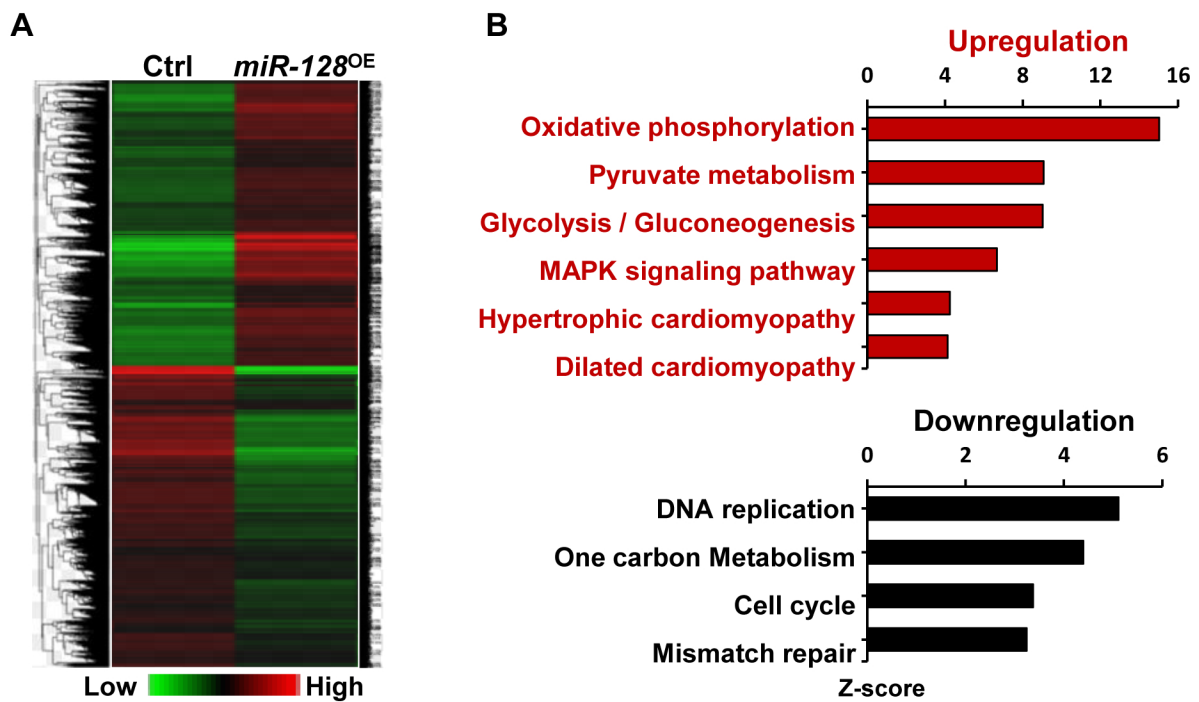

**Supplementary Figure 3. Distinct gene-expression profiles of *miR-128<sup>OE</sup>* hearts**

(A) Heat map of the RNA-seq data showing 1,761 upregulated and 1,639 downregulated genes in *miR-128<sup>OE</sup>* compared to Ctrl hearts at P7. (B) KEGG (Kyoto Encyclopedia of Genes and Genomes) pathway analysis illustrating a subset of upregulated and downregulated pathways in *miR-128<sup>OE</sup>* hearts as compared to Ctrl hearts at P7. Control (Ctrl) mice were *miR-128<sup>TetRE</sup>* mice, and *miR-128<sup>OE</sup>* mice were  $\alpha$ -MHC-tTA; *miR-128<sup>TetRE</sup>* mice.

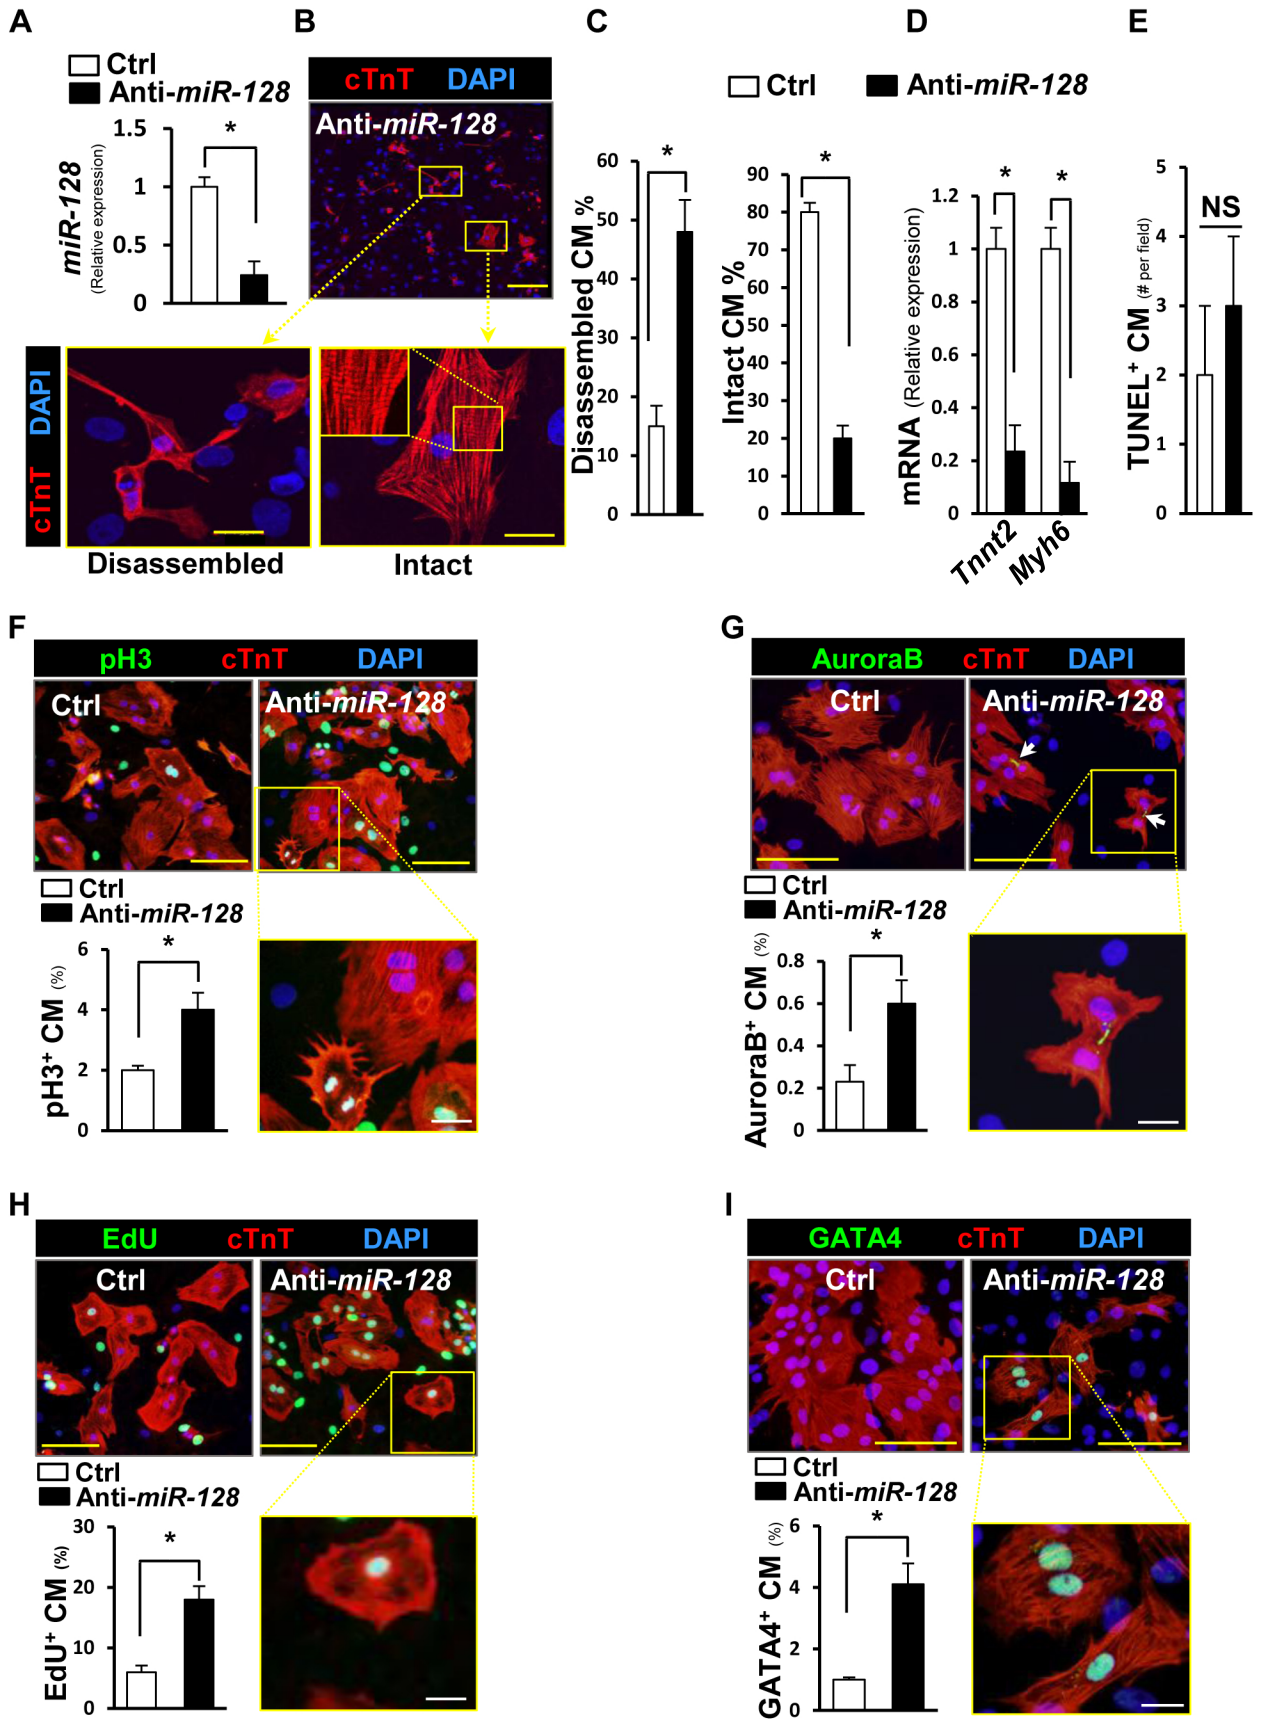

**Supplementary Figure 4. *MiR-128* inhibition promotes CM proliferation in vitro**

(A) Analysis of *miR-128* expression by qPCR in neonatal (P1) rat CMs treated with either negative control (Ctrl) or *miR-128* inhibitor (Anti-*miR-128*). (B) Representative images for CM sarcomere structure analyzed by cTnT immunofluorescence. Scale bars, 100  $\mu\text{m}$  (upper panel), 20  $\mu\text{m}$  (lower panel). (C) Quantification of CM numbers with disassembled sarcomere and intact sarcomere analyzed by cTnT immunostaining (n=5 mice, ~500 CMs/heart). (D) qPCR analysis of gene (*Tnnt2* and *Myh6*) expression in CMs. (E) Quantification of CM apoptosis by TUNEL staining. (F) Immunofluorescence staining with pH3 antibody to assess CM proliferation (n=5 mice, ~500 CMs/heart). Scale bars, 50  $\mu\text{m}$  (yellow); 10  $\mu\text{m}$  (white). (G) Immunofluorescence staining of CM proliferation by Aurora B kinase assay (n=5 mice, ~400 CMs/heart). ). Scale bars, 50  $\mu\text{m}$  (yellow); 10  $\mu\text{m}$  (white). (H) Immunofluorescence staining by EdU incorporation to assess CM proliferation (n=5 mice, ~500 CMs/heart). Scale bars, 50  $\mu\text{m}$  (yellow); 10  $\mu\text{m}$  (white). (I) Immunofluorescence staining of GATA4 (n=5 mice, ~400 CMs/heart). Scale bars, 50  $\mu\text{m}$  (yellow), 10  $\mu\text{m}$  (white). Statistical significance was calculated using Student's *t*-test in A, C, D, E, F, G, H, and I. Data are represented as means  $\pm$  SEM (n=3). \**P* <0.05. NS, not significant.

A

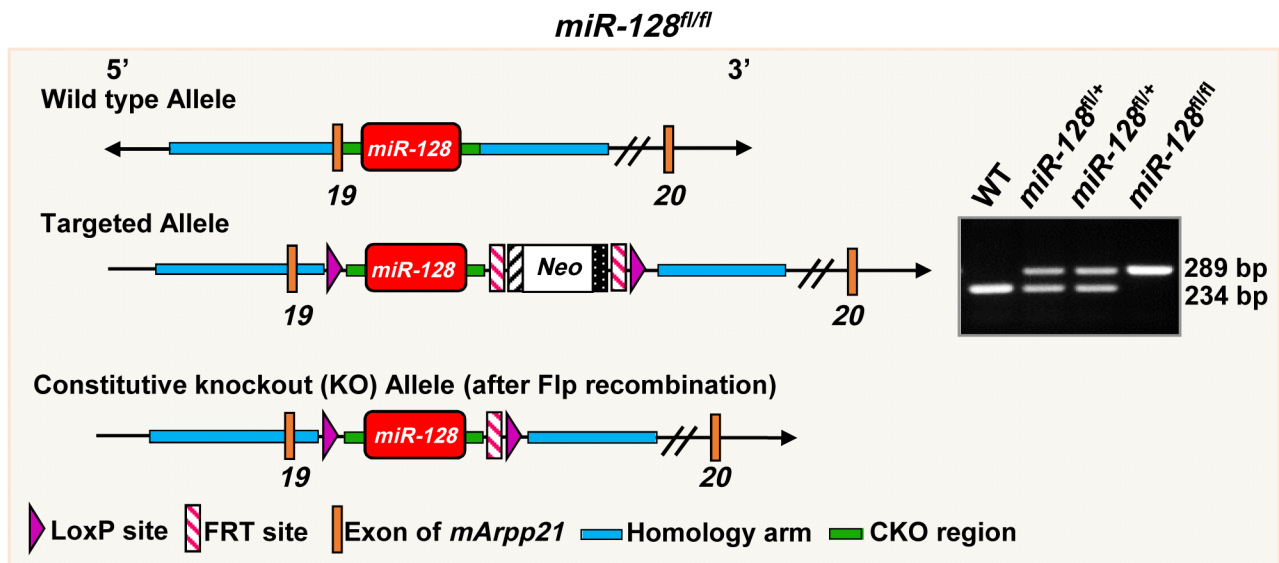

B

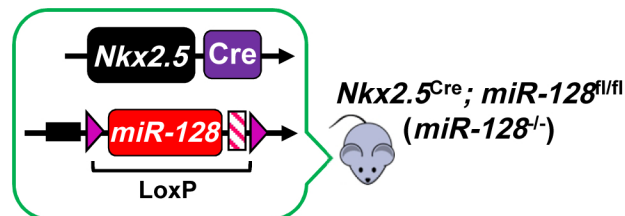

C

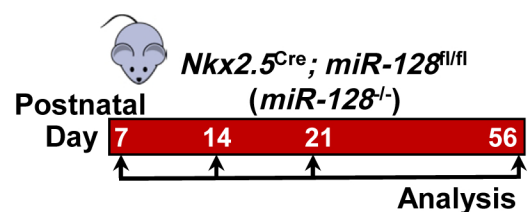

**Supplementary Figure 5. Generation of cardiac-specific *miR-128* knockout mouse**

(A) The strategy for generating *miR-128<sup>fl/fl</sup>* mice. The Flp recombinase was used to remove the neomycin gene (Neo) which was flanked by FRT (Flippase Recognition Target sites). (B) Generation of cardiac-specific *miR-128* knockout mice were generated by crossing *Nkx2.5-Cre* mice with *miR-128<sup>fl/fl</sup>* mice (*Nkx2.5-Cre; miR128<sup>fl/fl</sup>* were designated as *miR-128<sup>-/-</sup>*). Control mice were *miR-128<sup>fl/fl</sup>* mice. (C) A schematic diagram depicting the experimental design in Fig. 3.

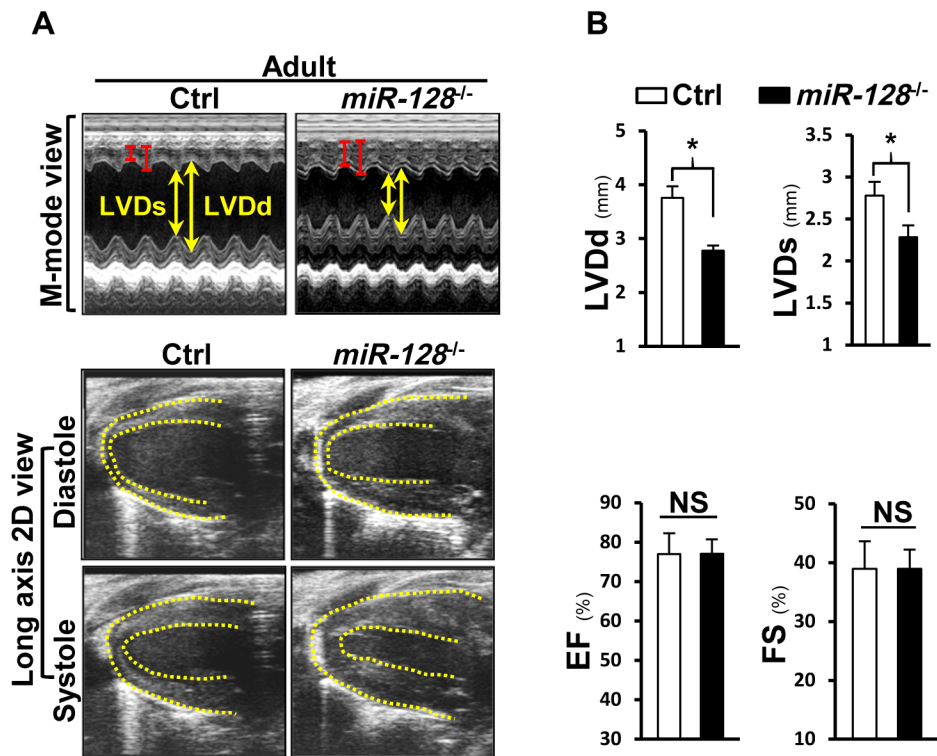

**Supplementary Figure 6. Effect of *miR-128* deletion on adult heart function**

**(A)** Heart function of adult mice (8 weeks old) as analyzed by echocardiography.

**(B)** Heart function quantified by LVDd, LVDs, EF, and FS. Control (Ctrl) mice were *miR-128<sup>fl/fl</sup>* mice, *miR-128<sup>-/-</sup>* mice were *Nkx2.5-Cre; miR-128<sup>fl/fl</sup>*. Statistical significance was calculated using Student's *t*-test in **B** (n=5). Data are means ± SEM. \**P* < 0.05. NS, not significant.



A

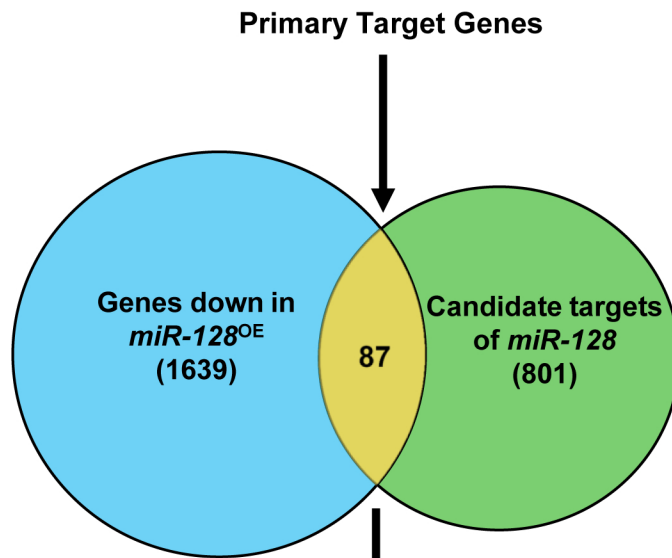

B

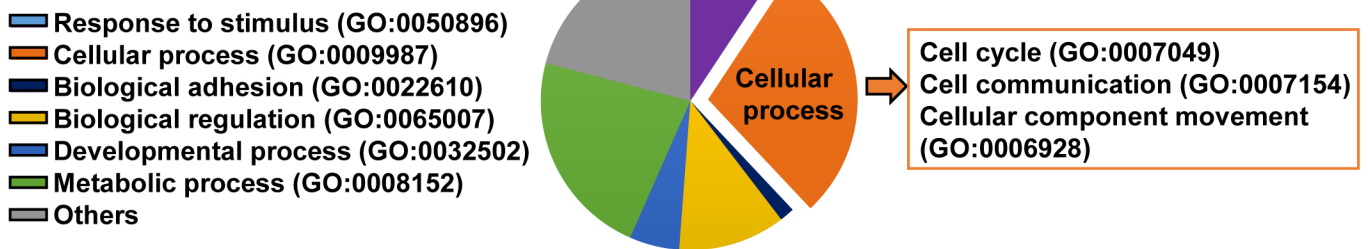

C

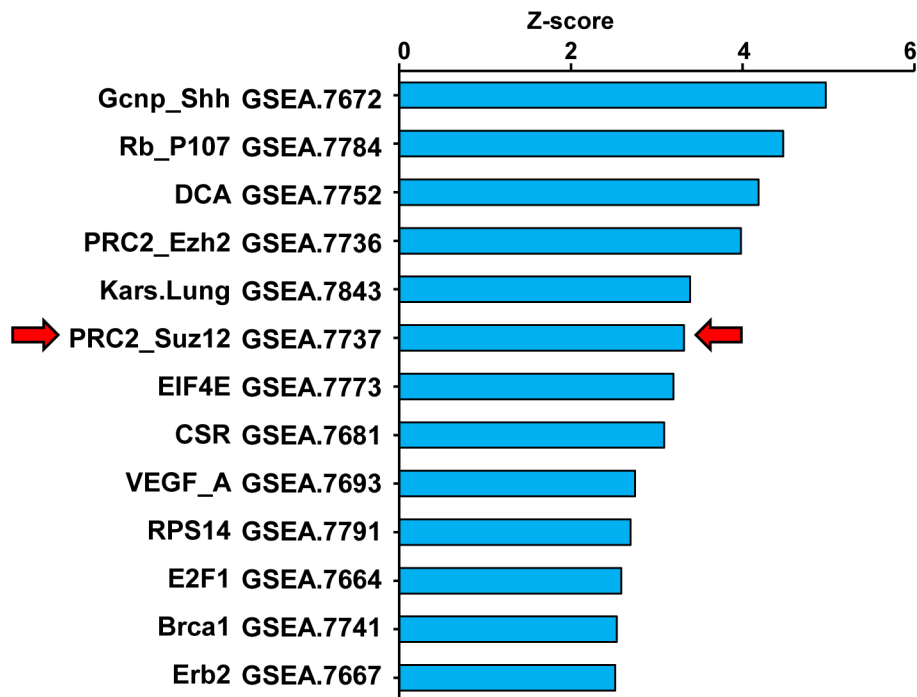

**Supplementary Figure 7. *MiR-128* regulates cell cycle through PRC2-*Suz12* pathway**

**(A)** Venn diagram of genes that were down-regulated in P7 *miR-128*<sup>OE</sup> hearts (blue) as compared to the Ctrl hearts and predicted candidate target genes of *miR-128* (green). The overlapping 87 genes (yellow) were considered as direct *miR-128* targets.

**(B)** Gene Ontology (GO) biological processes identified by PANTHER analysis using the overlapping 87 target genes of *miR-128*. **(C)** Enrichment analysis of down-regulated genes in *miR-128*<sup>OE</sup> hearts. Genes down-regulated in TIG3 cells upon knockdown of *Suz12* gene (PRC2\_SUZ12\_UP.V1\_DN) were enriched in *miR-128*<sup>OE</sup> hearts (red arrow).

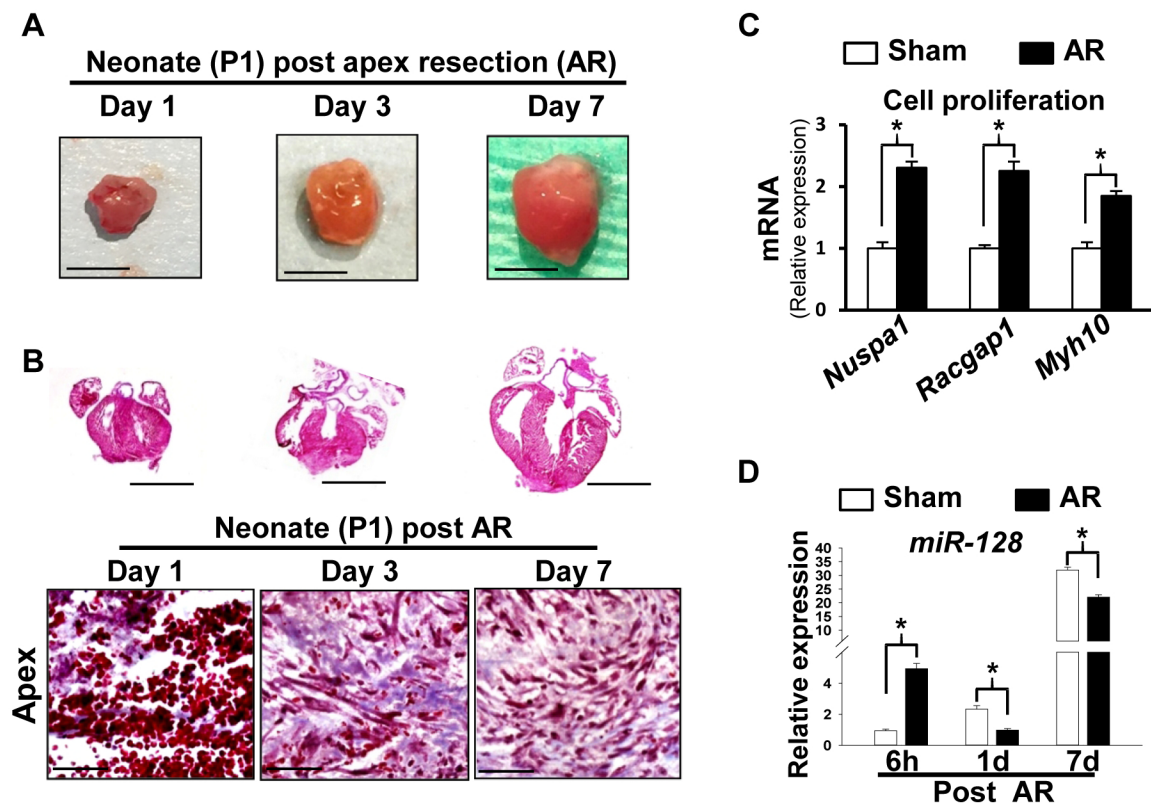

**Supplementary Figure 8. Downregulation of *miR-128* in neonatal mice during regeneration after injury**

(A) Representative gross (stereomicroscopic) morphology of wild type hearts at day 1, 3, and 7 following apex resection (AR) in P1 mice. Scale bars, 0.25 cm. (B) Representative image of Masson's Trichrome staining of hearts at day 1, 3, and 7 following AR in neonatal P1 heart (upper) and higher magnification of resected area (lower). Scale bars, 25  $\mu$ m. (C) qPCR analysis of cell cycle-related gene expression in neonatal hearts at day 7 following AR. (D) qPCR analysis of *miR-128* expression in neonatal hearts following AR. Statistical significance was calculated using Student's *t*-test in C and D. Data are represented as means  $\pm$  SEM (n=5). \**P* < 0.05.

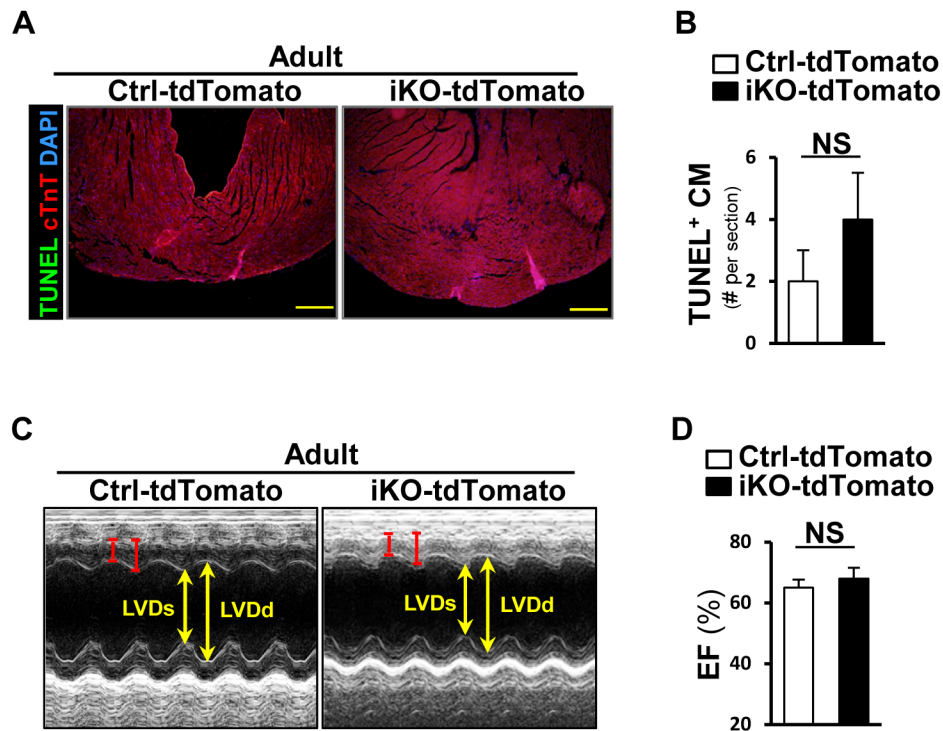

**Supplementary Figure 9. Effects of inducible *miR-128* knockout on normal heart**

(A-B) CM apoptosis analyzed by TUNEL staining on 6 week old control mice ( $\alpha$ -MHC<sup>MerCreMer</sup>; RosatdTomato, designated as Ctrl-tdTomato) and inducible *miR-128* knockout mice ( $\alpha$ -MHC<sup>MerCreMer</sup>; *miR-128*<sup>fl/fl</sup>; RosatdTomato, designated as iKO-tdTomato). Scale bars, 200  $\mu$ m. (C-D) Heart function analyzed by echocardiography and quantified by EF. Statistical significance was calculated using Student's *t*-test in B and D (n=5). Data are means  $\pm$  SEM. \**P* < 0.05. NS, not significant.

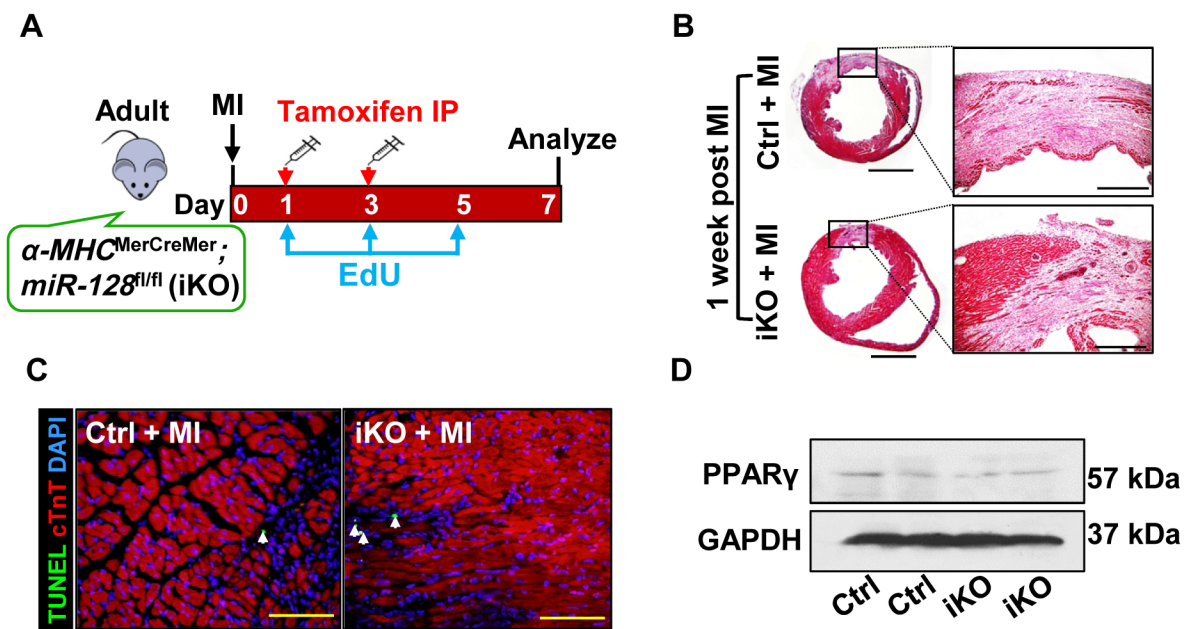

**Supplementary Figure 10. *MiR-128* deletion promotes cardiac regeneration in the adult heart after MI**

(A) A schematic diagram depicting the experimental design using adult transgenic mice (12 week old). (B) Masson's Trichrome staining of control (*miR-128<sup>fl/fl</sup>*, designated as Ctrl) and *miR-128* knockout ( $\alpha$ -MHC<sup>MerCreMer</sup>; *miR-128<sup>fl/fl</sup>*, designated as iKO) hearts at 1 week post tamoxifen (TAM) administration. Scale bars, 1 mm (*left panel*); 200  $\mu$ m (*right panel*). (C) Evaluation of CM apoptosis by TUNEL assay. Scale bars, 50  $\mu$ m. (D) Western blot assay of peroxisome proliferator-activated receptor gamma (PPAR $\gamma$ ) expression at 1 week post TAM administration.

**Fig. 4B**

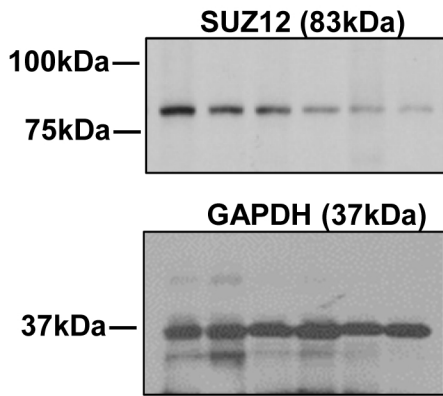

**Fig. 4D**

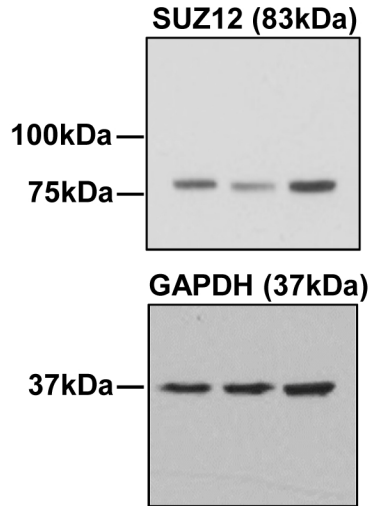

**Fig. 4G**

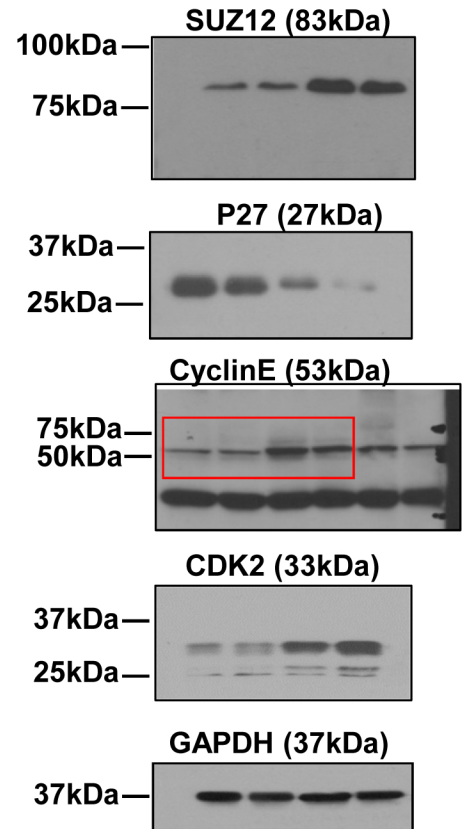

**Fig. 5G**

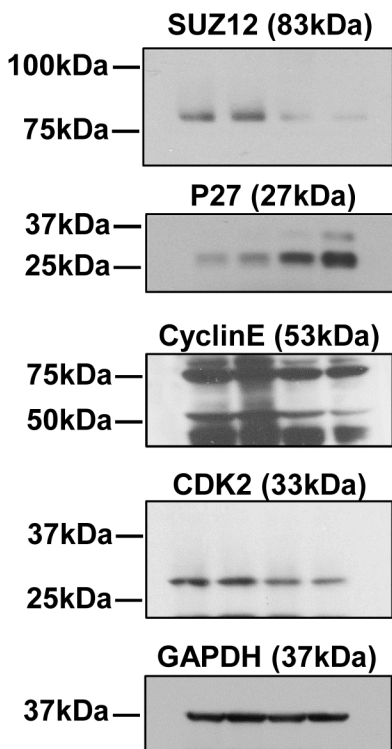

**Fig. 8B**

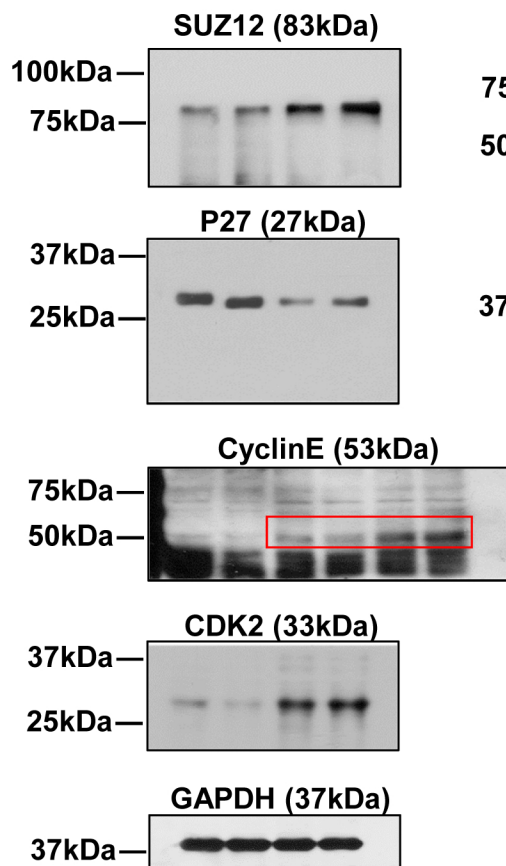

**Supplementary Fig. 10D**

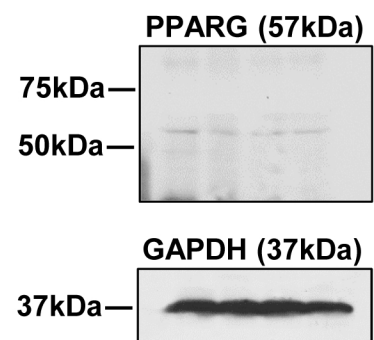

**Supplementary Figure 11. Uncropped images of immunoblots with molecular weight markers**

Uncropped images of the immunoblots with molecular weight markers (left side) displayed in the main and supplementary figures of the manuscript. The red boxes show the cropped blots of the identified proteins.

**Supplementary Table 1. PCR primers and oligonucleotides**

| <b>Target: Sequences (5'-3')</b>                                         |
|--------------------------------------------------------------------------|
| <b>RT-qPCR:</b>                                                          |
| <i>miR-128</i> : CGTCACAGTGAACCGGTCTCT;                                  |
| miRNA universal reverse primer: provided by miScript PCR Starter Kit;    |
| U6-F: CTCGCTTCGGCAGCACA;                                                 |
| U6-R: AACGCTTCACGAATTTGCGT;                                              |
| <i>Racgap1</i> -F: CAGATCCAGTGACAATGTTCCA;                               |
| <i>Racgap1</i> -R: TCCACCATCATGAACTGATTCC;                               |
| <i>Nusap1</i> -F: GAGGAGGAAGAAGCACAAGAC;                                 |
| <i>Nusap1</i> -R: CTACTATCAGTTCCTTTCATCTCCAA;                            |
| <i>Myh10</i> -F: GGAATTCGAGAGGCAGAACAA;                                  |
| <i>Myh10</i> -R: AAGGCTCGCTTGGATTTCTC;                                   |
| <i>Nppa</i> -F: CTGAGGTGCCTCCCTGGAC;                                     |
| <i>Nppa</i> -R: ACTCTGGGCTCCAATCCTGTC;                                   |
| <i>Nppb</i> -F: AAGGACCAAGGCCTCACAAA;                                    |
| <i>Nppb</i> -R: GCCAGGAGGTCTTCCTACAAC;                                   |
| <i>Myh6</i> -F: GGACGCCCAGATGGCTGACT;                                    |
| <i>Myh6</i> -R: CCTTGTCATCAGGCACGAAGCAC;                                 |
| <i>Myh7</i> -F: GTTTGTC AAGGCCAAGATCGTGT;                                |
| <i>Myh7</i> -R: AGCATGGCCATGTCCTCGAT;                                    |
| <i>Tnnt2</i> -F: TTCATGCCCAACTTGGTGCC;                                   |
| <i>Tnnt2</i> -R: CTCTTCAGCCAGGCGGTTCT;                                   |
| <b>ChIP-qPCR:</b>                                                        |
| (SUZ12, EZH2 and H3K27me3) <i>p27</i> -promoter-F: GAGATCCTACGGTGGAAGCG; |



(SUZ12, EZH2 and H3K27me3) *p27*-promoter-R: CTTAGCTGGGGTGCGGAATC;

**Genotyping of *miR-128* knockin**

Targeted transgenic allele-F: TGAGCCAGACCTCCATCGC

Targeted transgenic allele-R: AGCTCGGTACCATTAATCG

Wild type allele-F: ACTCCAAGGCCACTTATCACC

Wild type allele-R: ATTGTTACCAACTGGGACGACA

**Genotyping of *miR-128* knockout**

Targeted transgenic allele-F: GCCCTAATTTGATCATCAGAACC

Targeted transgenic allele-R: CATTGTTGTAGCCACACCCC

Wild type allele-F: TCATAGCTGTACTTACTGGATG

Wild type allele-R: CACTTGGGCTTGGAAGATAG

**Cloning of *Suz12* 3'UTR**

Wild type F: CCGCTCGAGGTTTCCTTTGTGACATCCTTCTTGA

Wild type R:

AAGGAAAAAAGCGGCCGCATACCAGTATTTACAGCAGCATTGA

Mutant F: cacGTTGAATAACATCACCTCAATTTTTTATTATC

Mutant R: tctgCTTGGAGCTGGAATAAAAAG
